# Supplementary material for: Sorafenib Inhibits Epithelial-Mesenchymal Transition through an Epigenetic-Based Mechanism in Human Lung Epithelial Cells
Source: PLoS One. 2013 May 31;8(5):e64954. doi: 10.1371/journal.pone.0064954 (PMC3669213; doi:10.1371/journal.pone.0064954)
Supplement: Dataset S3 — DAVID Pathway Enrichment Analysis of DHMGs reciprocally regulated by sorafenib during EMT. The file contains DAVID Pathway Enrichment Analysis of DHMGs reciprocally regulated by sorafenib during EMT. (XLS) [file pone.0064954.s010.xls]

## Sheet: DAVID pathway analysis
	DAVID Pathway Enrichment Analysis of DHMGs reciprocally regulated by sorafenib during EMT
	The tables list the enriched pathways, number of genes in the DHMGs list and also in the category (count), the corresponding gene symbols (genes) , p-value (EASE score < 0.05) calculated by Benjamini- corrected modified Fisher ’s exact test (P value).
	H3K4me3
	Enriched pathways	Count	Genes	P value
	Pathways in cancer	63	E2F2, PPARD, PDGFB, MITF, MMP2, PTEN, CTNNB1, TGFB2, ACVR1B, CCNE1, TGFA, CSF3R, RALA, RARA, RARB, TPR, FGF2, CHUK, PRKCA, EGFR, PLD1, AR, CYCS, CDK6, DAPK1, VEGFC, VEGFA, MDM2, WNT9A, GSTP1, BID, FGFR1, GRB2, KITLG, CDH1, KIT, TCF7L2, TCF7L1, IGF1R, PTK2, RAC3, SOS1, ITGAV, RAC1, LAMB1, COL4A4, BMP4, DVL2, FZD8, BMP2, EPAS1, TGFBR1, TGFBR2, ITGA2, ITGA3, STAT3, CBLB, GSK3B, BAX, PTCH1, TCEB1, WN…	2.95576e-06
	Focal adhesion	44	CAV1, PDGFB, GRB2, ITGB4, ITGA11, PTEN, PXN, SRC, CTNNB1, IGF1R, PTK2, ITGB8, RAC3, SOS1, ITGAV, COMP, PAK4, RAC1, SHC1, PDGFD, PAK1, LAMB1, COL11A1, COL4A4, EGFR, PRKCA, ACTB, VAV3, ROCK2, ACTN1, ITGA2, ITGA3, MYL12A, PPP1CB, COL5A1, VASP, FLNA, VEGFC, ITGA5, GSK3B, ITGA8, VEGFA, COL1A1, CRK	4.45521e-06
	Axon guidance	29	GNAI1, ABLIM3, EFNA3, PPP3R1, EPHB1, EPHB2, PTK2, CXCR4, RAC3, SEMA7A, PAK4, RAC1, SEMA3C, NFATC4, UNC5D, PAK1, ROCK2, NTN4, DPYSL2, SLIT3, SEMA6A, EPHA6, RND1, RGS3, GSK3B, CFL2, CFL1, EFNA5, SRGAP1	0.000164797
	Adherens junction	20	EGFR, ACTB, FGFR1, TGFBR1, TGFBR2, LMO7, ACTN1, CDH1, SNAI2, SNAI1, TCF7L2, SRC, TCF7L1, CTNNB1, ACVR1B, IGF1R, CSNK2A1, RAC3, RAC1, WASL	0.0003388
	Regulation of actin cytoskeleton	40	FGFR1, ENAH, PDGFB, ITGB4, ITGA11, RDX, PXN, PTK2, EZR, ITGB8, RAC3, SOS1, PAK4, ITGAV, RAC1, RRAS, PDGFD, MSN, PAK1, FGF2, EGFR, ACTB, VAV3, ROCK2, ARHGEF7, ACTN1, ITGA2, IGF2, ITGA3, MYL12A, MYH9, PPP1CB, NCKAP1, ITGA5, CFL2, ITGA8, CFL1, WASL, CRK, PIP4K2B	0.000536751
	Prostate cancer	21	EGFR, E2F2, FGFR1, AR, PDGFB, GRB2, CREB1, IGF2, PTEN, TCF7L2, TCF7L1, CTNNB1, CCNE1, IGF1R, GSK3B, SOS1, MDM2, TGFA, PDGFD, CHUK, GSTP1	0.000877347
	Proteasome	14	PSMA7, PSMA1, PSMF1, PSMC5, PSMB1, PSME1, PSMA6, PSME2, PSMB3, PSMB2, PSMD3, PSME3, PSMD7, PSMD8	0.000927847
	MAPK signaling pathway	44	FGFR1, PDGFB, GRB2, MAPKAPK5, MKNK2, DUSP10, PPP3R1, TGFB2, ACVR1B, MAP3K3, RASGRP3, RAC3, RASGRP1, SOS1, MAP3K8, RAC1, RRAS, IL1B, NFATC4, PAK1, FGF2, CHUK, IL1A, MAP2K6, PRKCA, EGFR, TGFBR1, NF1, TAOK3, TGFBR2, FLNA, DDIT3, DUSP5, DUSP4, RPS6KA3, RASGRF2, ARRB2, DUSP1, GADD45G, GADD45B, CACNA1C, CRK, DUSP6, MAP3K11	0.00337593
	Calcium Signaling by HBx of Hepatitis B virus	6	GRB2, PTK2B, CREB1, SOS1, SHC1, SRC	0.00343933
	Angiotensin II mediated activation of JNK Pathway via Pyk2 dependent signaling	11	PRKCA, EGFR, PTK2, GNAQ, GRB2, PTK2B, SOS1, RAC1, SHC1, PAK1, SRC	0.00541851
	Colorectal cancer	18	EGFR, DVL2, FZD8, GRB2, TGFBR1, CYCS, TGFBR2, TCF7L2, TCF7L1, CTNNB1, TGFB2, ACVR1B, IGF1R, RAC3, GSK3B, BAX, SOS1, RAC1	0.00658269
	Pancreatic cancer	16	EGFR, E2F2, PLD1, TGFBR1, TGFBR2, CDK6, STAT3, TGFB2, ACVR1B, VEGFC, RAC3, RAC1, VEGFA, TGFA, RALA, CHUK	0.00791114
	p53 signaling pathway	15	BID, CDK1, ZMAT3, CYCS, CDK6, PTEN, CCNE1, PPM1D, CCNB2, BBC3, BAX, SERPINE1, GADD45G, MDM2, GADD45B	0.011237
	Arrhythmogenic right ventricular cardiomyopathy (ARVC)	16	ACTB, LMNA, ITGA11, ITGB4, ACTN1, ITGA2, ITGA3, TCF7L2, TCF7L1, CTNNB1, PKP2, ITGB8, ITGA5, ITGAV, ITGA8, CACNA1C	0.0130403
	ECM-receptor interaction	17	COL4A4, ITGA11, ITGB4, ITGA2, ITGA3, SDC4, COL5A1, SDC1, CD44, ITGB8, ITGA5, ITGAV, ITGA8, COMP, COL1A1, LAMB1, COL11A1	0.0147116
	Endocytosis	30	CHMP2A, CHMP4C, CHMP4B, ASAP2, ARF6, KIT, SRC, ACVR1B, IGF1R, DAB2, CXCR4, RAB11A, IQSEC1, EGFR, PLD1, RAB4A, TGFBR1, TGFBR2, CBLB, CHMP1B, ARRB2, NEDD4, ACAP2, SH3KBP1, VPS24, MDM2, PDCD6IP, GRK5, CLTCL1, PIP4K2B	0.0195012
	Glioma	13	EGFR, PRKCA, E2F2, PDGFB, GRB2, CDK6, PTEN, IGF1R, SOS1, TGFA, MDM2, CALM3, SHC1, CALM2	0.0321918
	Links between Pyk2 and Map Kinases	9	PRKCA, GNAQ, GRB2, PTK2B, SOS1, RAC1, SHC1, PAK1, SRC	0.0397383
	ErbB signaling pathway	16	PRKCA, EGFR, GRB2, SRC, PTK2, CBLB, EIF4EBP1, SOS1, PAK4, GSK3B, TGFA, SHC1, PAK1, AREG, NRG1, CRK	0.0405247
	Cell cycle	21	E2F2, CDK1, CDC6, YWHAZ, CDK6, CDC27, YWHAE, ORC1L, MCM5, TGFB2, CCNE1, CCNB2, PLK1, GSK3B, GADD45G, YWHAQ, TFDP2, MDM2, ANAPC7, GADD45B, STAG1	0.0411215
	H3K9ac
	Enriched pathways	Count	Genes	P value
	Pathways in cancer	50	E2F1, HSP90AB1, PPARG, MITF, FGF11, CTNNB1, TGFB2, CCNE2, FOS, CASP9, RARA, WNT6, FGF1, AR, PLD1, RET, CTBP2, PRKCG, CTNNA1, DAPK1, JUP, SMO, LAMC3, WNT5A, WNT5B, GRB2, KITLG, CDH1, ITGB1, LAMB3, RAC2, RAC3, ITGAV, SOS1, SOS2, TRAF4, FN1, BMP4, FZD1, SMAD3, SMAD2, FZD2, BIRC3, WNT7B, CDKN1B, LAMA5, NTRK1, JAK1, PTCH1, WNT7A	1.70357e-06
	Wnt signaling pathway	24	WNT5A, PPP2R1B, NKD1, CTBP2, WNT5B, BTRC, FZD1, SMAD3, PRKCG, SMAD2, SKP1, FZD2, CTNNB1, WNT7B, RAC2, ROCK1P1, RAC3, PRICKLE2, CAMK2D, FRAT2, SIAH1, WNT6, WNT7A, LRP5	0.000835436
	Focal adhesion	28	GRB2, TNC, VTN, ITGB1, SRC, CTNNB1, CHAD, LAMB3, RAC2, RAC3, ITGAV, SOS1, SOS2, PDGFC, SHC1, THBS1, RAPGEF1, FN1, ACTB, PRKCG, MYL12B, PPP1CC, FLNC, BIRC3, LAMC3, LAMA5, ROCK1P1, COL1A1	0.00214944
	Cell cycle	19	E2F1, CDC7, FZR1, RBL2, SMAD3, SMAD2, SKP1, MCM2, CDC25A, MCM5, TGFB2, CDC25B, CCNE2, CDKN1B, CDKN2C, PLK1, TFDP2, STAG2, STAG1	0.00554145
	Regulation of actin cytoskeleton	28	SSH1, SSH3, ITGAE, DIAPH2, IQGAP3, FGF11, RDX, ITGB1, TTLL3, RAC2, RAC3, GSN, ITGAV, SOS1, SOS2, PIKFYVE, PDGFC, FGF1, FN1, ACTB, LIMK2, MYL12B, PPP1CC, ROCK1P1, F2, SCIN, CYFIP1, MYH10	0.00556663
	Basal cell carcinoma	11	WNT5A, BMP4, SMO, WNT7B, WNT5B, FZD1, PTCH1, FZD2, WNT6, WNT7A, CTNNB1	0.00724454
	Colorectal cancer	13	GRB2, FZD1, SMAD3, SMAD2, FZD2, TGFB2, CTNNB1, FOS, RAC2, CASP9, RAC3, SOS1, SOS2	0.0228096
	ECM-receptor interaction	13	TNC, VTN, SDC4, ITGB1, CHAD, LAMB3, CD44, LAMA5, LAMC3, ITGAV, COL1A1, THBS1, FN1	0.0228096
	Hedgehog signaling pathway	10	WNT5A, BMP4, SMO, WNT7B, WNT5B, BTRC, PTCH1, WNT6, WNT7A, ZIC2	0.0230305
	MAPK signaling pathway	30	GRB2, FGF11, TGFB2, FOS, RASGRP3, RAC2, RAC3, SOS1, RASGRP1, RASGRP2, SOS2, FGF1, IL1A, TAOK3, PRKCG, FLNC, TAB2, STK3, CDC25B, MAP4K3, DUSP5, DUSP4, PLA2G4A, RPS6KA1, ARRB1, NTRK1, PLA2G6, DUSP8, MAP3K12, DUSP6	0.0279704
	Adherens junction	12	ACTB, RAC2, RAC3, LMO7, SMAD3, CTNND1, CDH1, SMAD2, SNAI2, CTNNA1, SRC, CTNNB1	0.0286075
	TGF-beta signaling pathway	13	BMP4, PPP2R1B, RBL2, SMAD6, SMAD3, SMAD2, SKP1, TGFB2, INHBB, ID2, ROCK1P1, THBS1, BMPR1B	0.0292248
	Arginine and proline metabolism	9	GOT2, GLUL, ACY1, SRM, P4HA3, ALDH2, AMD1, ALDH3A2, CKB	0.0434707
	H3K27me3
	Enriched pathways	Count	Genes	P value
	Chemokine_families	8	CCL1, CCL11, CCL13, CCL3, CCL14, CCL8, CCL15, CCL4, CCL7	9.85025e-05
	Cytokine-cytokine receptor interaction	21	CCL1, CCL3, FLT1, TNFRSF13B, CCL8, CCL16, IL22, CCL15, CCL4, CCL7, CCL18, CCL11, GH2, TSLP, CCR7, CCL13, CCL14, CCL23, PRLR, TPO, IL5RA, NGFR	0.00156009
	Neuroactive ligand-receptor interaction	20	CALCR, PTGER3, DRD3, CCKBR, NTSR2, GCGR, GH2, AGTR1, GRM3, SSTR2, TAAR6, S1PR1, PRLR, GRM8, GRIN2C, NMUR1, HTR7, P2RY1, AVPR1B, GALR2	0.00281998
	Chemokine signaling pathway	16	CCL1, CCL3, ADCY1, GRB2, CCL8, CCL16, CCL15, CCL4, CCL18, CCL7, CCL11, CCR7, CCL13, CCL23, CCL14, PIK3R5, PAK1	0.00380578
	Calcium signaling pathway	14	SLC8A3, ADCY1, PTGER3, CCKBR, SPHK1, AGTR1, PDE1B, GRIN2C, RYR3, HTR7, AVPR1B, RYR1, CHRNA7, NOS2	0.0133338
	MAPK signaling pathway	17	MEF2C, NTF3, FGF14, FGF9, GRB2, MAP2K3, MAP2K4, CACNG5, FGF23, CACNG4, FGF10, CACNB4, CACNG1, MECOM, DUSP3, MOS, PAK1	0.0386414
	Phospholipids as signalling intermediaries	4	ADCY1, S1PR1, SPHK1, ITGB3	0.047489
